# Supplementary material for: Conservation of inner nuclear membrane targeting sequences in mammalian Pom121 and yeast Heh2 membrane proteins
Source: PubMed Central journal article supplement — Mol Biol Cell. 2015 Sep 15;26(18):3301–12. doi: 10.1091/mbc.E15-03-0184 (PMC4569319; doi:10.1091/mbc.e15-03-0184), 2015-09-15
Supplement: supp_E15-03-0184v1_CombinedSupMats.pdf [file supp_E15-03-0184v1_CombinedSupMats.pdf]

# Supplemental Materials

*Molecular Biology of the Cell*

Kralt et al.

Supplemental Material to:

## **Conservation of inner nuclear membrane targeting sequences in mammalian Pom121 and yeast Heh2 membrane proteins**

Annemarie Kralt\*, Noorjahan B. Jagalur†, Vincent van den Boom‡, Ravi K. Lokareddy§, Anton Steen\*, Gino Cingolani§, Maarten Fornerod† and Liesbeth M. Veenhoff\*

Contents:

Supplemental Figures:

Figure S1: An ID linker region between the transmembrane segment and the NLS is required for INM import of proteins with TM-L-NLS topology

Figure S2: DAM methylation of DNA at the nuclear periphery confirms the NLS dependent INM localization of these proteins

Figure S3: Visualization of expression of NLS-L-TM and TM-L-NLS reporter proteins in yeast by Western blotting.

Supplemental Tables:

Table S1: Data collection and refinement statistics.

Table S2: Structural alignment of Pom121NLS with other NLSs visualized crystallographically in complex with importin  $\alpha$  and Kap60.

Table S3: Plasmids for *S. cerevisiae*

Table S4: Yeast strains

Table S5: Plasmids for HEK293T cells

Table S6: Amino acid sequences of reporter proteins in *S. cerevisiae*

Table S7: Amino acid sequences of reporter proteins in HEK293T cells

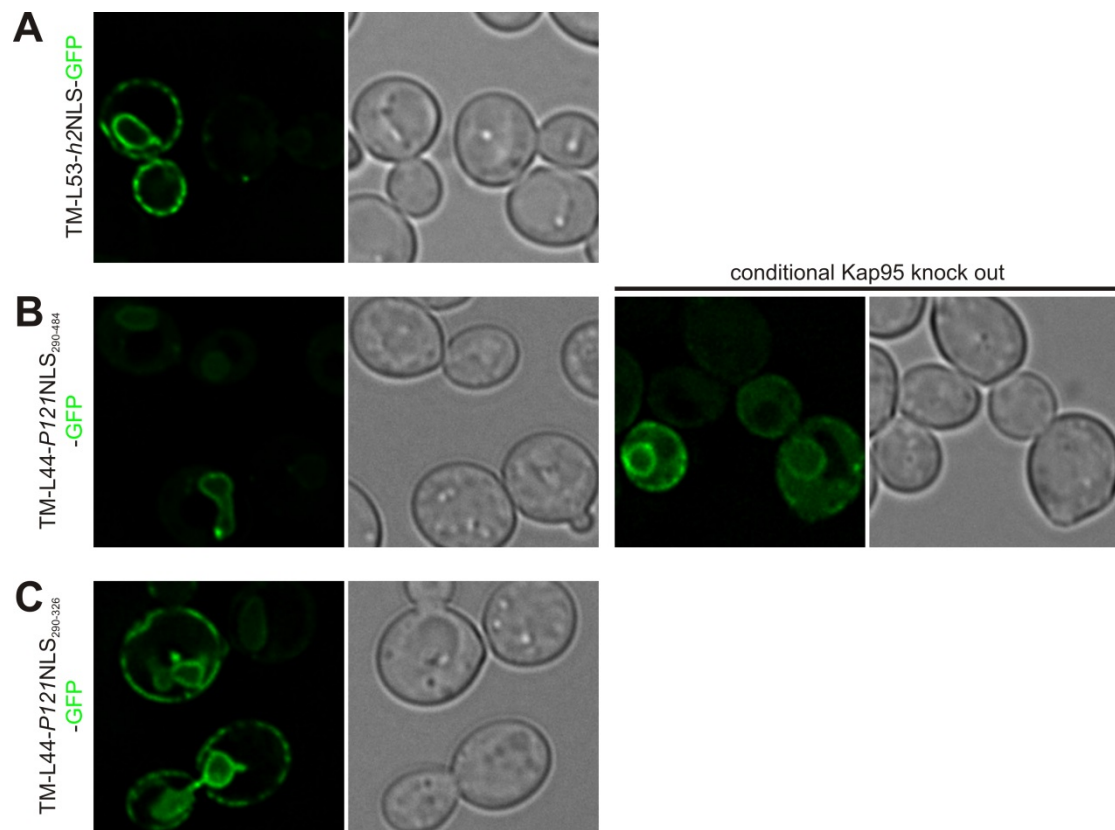

**Figure S1** An ID linker region between the transmembrane segment and the NLS is required for INM import of proteins with TM-L-NLS topology (A) TM-L53-*h2NLS*-GFP, with an ID linker region that was shortened from 180 to 53 residues, did not accumulate at the INM, but was dispersed over the NE-ER network. (B) TM-L44-*Pom121NLS*<sub>290-484</sub>-GFP with reduced ID linker region and the full *Pom121NLS* still localized to the INM in a Kap95-dependent manner. (C) TM-L44-*Pom121NLS*<sub>290-326</sub>-GFP, which encodes the shortened ID linker and only the IBB-like region of *Pom121NLS*, localized to the NE-ER network and did not accumulate at the INM. The accumulation in (B) may be explained as the ~70 residues of the IBB-like and the spacing region to the third stretch of basic residues of the *Pom121NLS* region could function as part of the ID linker region, and the second C-terminal importin binding site in the *Pom121NLS* region mediates INM localization of this reporter.

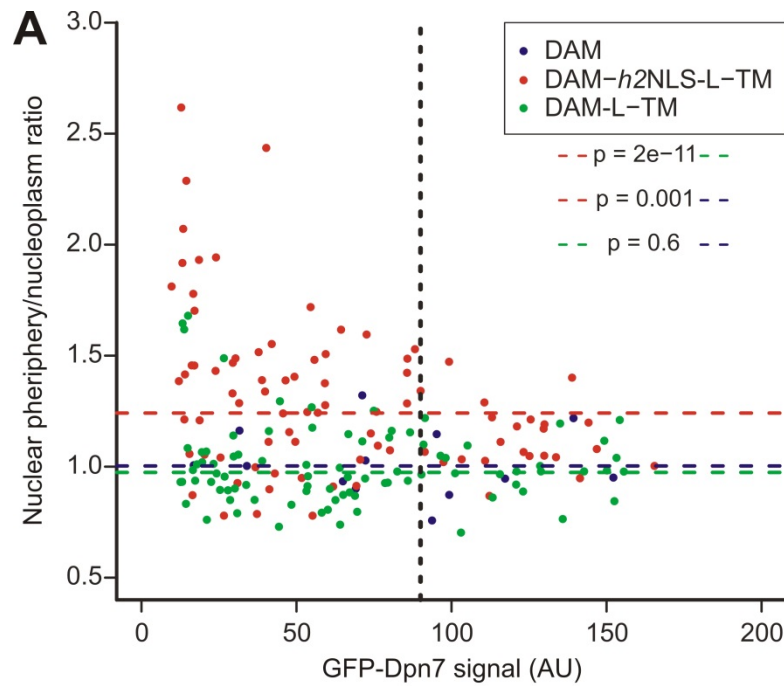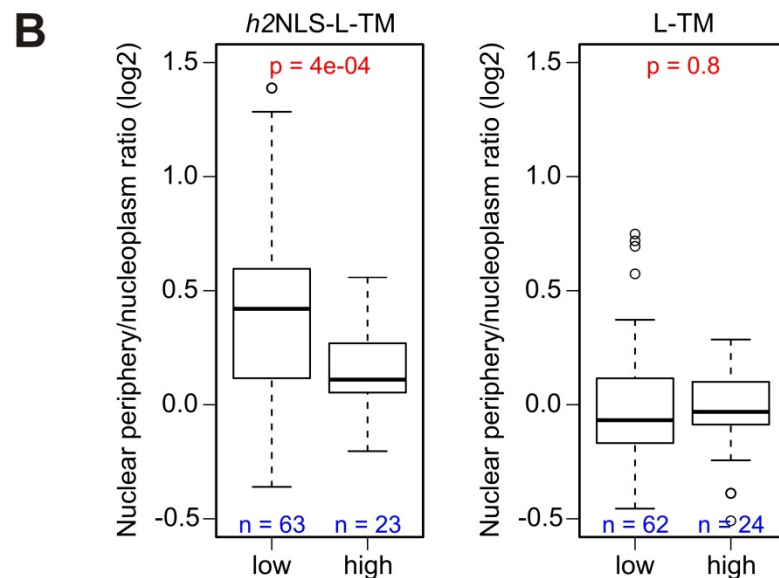

**Figure S2** DAM methylation of DNA at the nuclear periphery confirms the NLS dependent INM localization of these proteins (A) The accumulation of GFP-Dpn7 at the periphery of the nucleus in cells expressing DAM (blue), DAM-*h2NLS-L-TM* (red) and DAM-*L-TM* (green) is represented as the ratio of average fluorescent signal at the cell periphery over the average fluorescent signal in the nucleoplasm (periphery-nucleoplasm ratio or P/N ratio). The periphery-nucleoplasm ratio was plotted against the average GFP-Dpn7 signal in the nucleus. The mean ratios are indicated by the dotted lines. An arbitrary cut-off between cells that express high and low levels of GFP-Dpn7 was set at 90 AU (black dotted line). P-values are calculated using the Wilcoxon test. (B) Boxplots comparing the P/N ratios of D-*h2NLS-L-TM* and D-*L-TM* expressing cells with low or high GFP-Dpn7 expression levels. No significant difference was found for cells expressing *L-TM*, but a significant difference was found for cells expressing *h2NLS-L-TM*. Logged data follows a normal distribution according to Shapiro-Wilk and P-values are calculated using Student t-test.

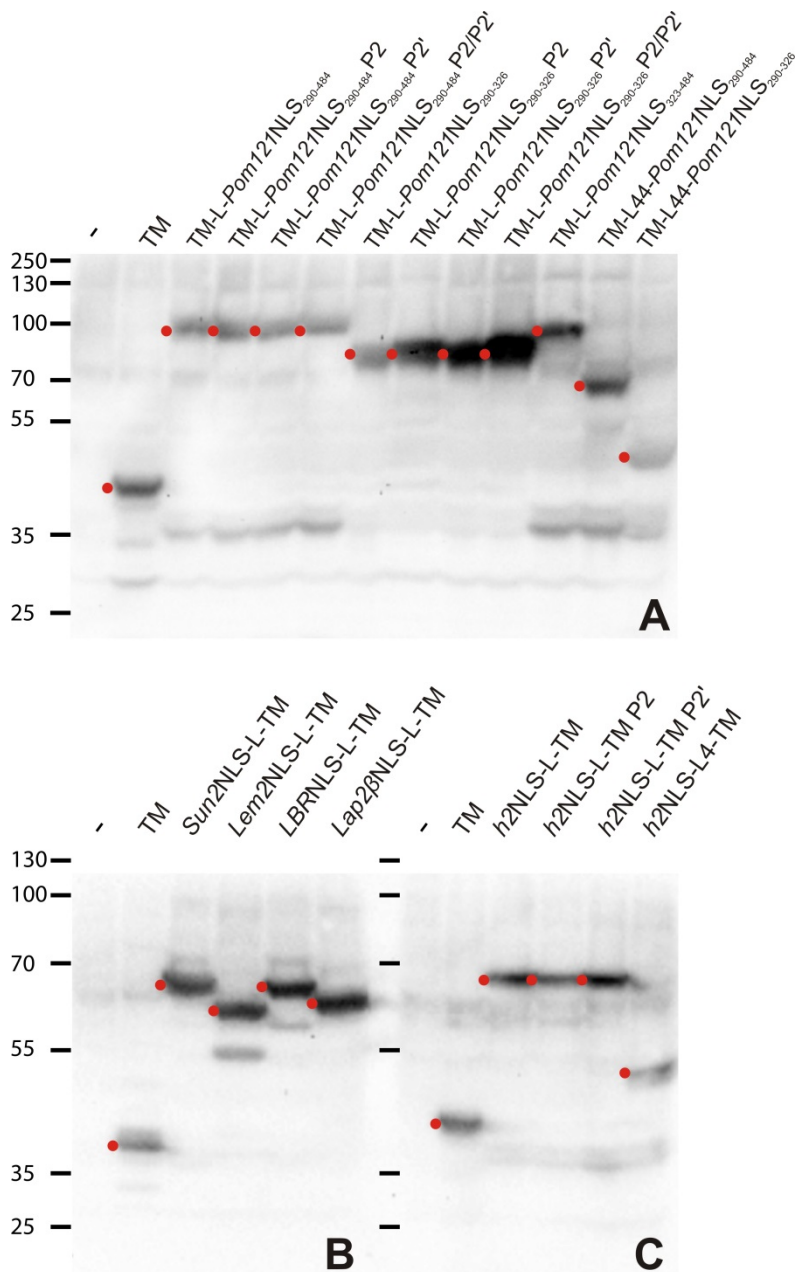

**Figure S3** Visualization of expression of NLS-L-TM and TM-L-NLS reporter proteins in yeast by Western blotting. Cell lysates were prepared from equal amounts of *S.cerevisiae* KAP95AA cells expressing C-terminal (A,C) and N-terminal GFP-tagged reporter proteins and anti-GFP was used for immuno-detection.

Table S1: Data collection and refinement statistics.

---

| <b><math>\Delta</math>IBB-importin <math>\alpha</math>1:Pom121NLS</b> |                                               |
|-----------------------------------------------------------------------|-----------------------------------------------|
| <b>Data collection</b>                                                |                                               |
| Space group                                                           | P2 <sub>1</sub> 2 <sub>1</sub> 2 <sub>1</sub> |
| Cell dimensions                                                       |                                               |
| <i>a</i> , <i>b</i> , <i>c</i> (Å)                                    | 78.3, 89.8, 97.9                              |
| $\alpha$ , $\beta$ , $\gamma$ (°)                                     | 90.0, 90.0, 90.0                              |
| Resolution (Å)                                                        | 15-1.80                                       |
| No. reflections (tot/unique)                                          | 992,426 / 62,116                              |
| <i>R</i> <sub>sym</sub>                                               | 5.7 (50.1)                                    |
| <i>I</i> / $\sigma$ <i>I</i>                                          | 34.7 (2.1)                                    |
| Completeness (%)                                                      | 97.8 (98.3)                                   |
| Redundancy                                                            | 3.6 (3.2)                                     |
| <b>Refinement</b>                                                     |                                               |
| Resolution (Å)                                                        | 15-1.80                                       |
| No. reflections used                                                  | 60,036                                        |
| <i>R</i> <sub>work</sub> / <i>R</i> <sub>free</sub>                   | 18.2 / 20.9                                   |
| No. atoms                                                             |                                               |
| Protein                                                               | 3,241                                         |
| Ligand (Pom121NLS)                                                    | 449                                           |
| Water                                                                 | 607                                           |
| <i>B</i> -factors (Å <sup>2</sup> )                                   |                                               |
| Protein                                                               | 28.6                                          |
| Ligand/ion                                                            | 71.8                                          |
| Water                                                                 | 39.6                                          |
| R.m.s. deviations                                                     |                                               |
| Bond lengths (Å)                                                      | 0.007                                         |
| Bond angles (°)                                                       | 1.09                                          |

---

Values in parentheses are for highest-resolution shell (1.86-1.80).

The *R*<sub>free</sub> was calculated using 5% of randomly selected reflections.

Table S2: Structural alignment of Pom121NLS with other NLSs visualized crystallographically in complex with importin  $\alpha$  and Kap60.

| <u>NLS type</u>  | <u>Minor Binding Site</u>                                                                                         | <u>Major Binding Site</u>                                                  | <u>PDB id</u>               |
|------------------|-------------------------------------------------------------------------------------------------------------------|----------------------------------------------------------------------------|-----------------------------|
|                  | P <sub>-1</sub> 'P <sub>0</sub> 'P <sub>1</sub> 'P <sub>2</sub> 'P <sub>3</sub> 'P <sub>4</sub> 'P <sub>5</sub> ' | P <sub>1</sub> P <sub>2</sub> P <sub>3</sub> P <sub>4</sub> P <sub>5</sub> |                             |
| SV40T-ag         | P K K <b>K</b> R K                                                                                                | P K <b>K</b> K R K V                                                       | 1EJL/1BK6*                  |
| hPLSCR1-NLS      |                                                                                                                   | G <b>K</b> I S K HWTGI                                                     | 1Y2A                        |
| hPLSCR4-NLS      | S I I <b>R</b> K W N                                                                                              |                                                                            | 3Q5U                        |
| Gu $\alpha$ -NLS | G Q K <b>R</b> S F S                                                                                              |                                                                            | 3ZIN                        |
| A89-NLS          | L G K <b>R</b> K Y W                                                                                              |                                                                            | 4B8P**                      |
| B54-NLS          | L G K <b>R</b> K R H                                                                                              |                                                                            | 2YNS**                      |
| TPX2             | K <b>R</b> K H                                                                                                    | P V <b>K</b> M I K                                                         | 3KND                        |
| C-Myc            | K <b>R</b> V K L                                                                                                  | P A A <b>K</b> R V K                                                       | 1EE4*                       |
| NP               | A V K <b>R</b> P A A                                                                                              | TKKAGQ                                                                     | A K <b>K</b> K K L D        |
| Kap60-IBB        | E L R <b>R</b> R R D                                                                                              | TQQVELRKAKRDEA                                                             | L A <b>K</b> R R N F        |
| h1NLS            | TR K K <b>R</b> K D P                                                                                             | DSDDWSES                                                                   | N S <b>K</b> E N K ID       |
| h2NLS            | T N K <b>R</b> K R E                                                                                              | QISTDNEAKMQIQEEKS                                                          | P K <b>K</b> K R K KRSSKANK |
| Pom121NLS        | K E K <b>K</b> K R T                                                                                              | VAEEDQLHLDGQ                                                               | E N <b>K</b> R R R HDSS     |

\* denotes yeast importin  $\alpha$  (Kap60).

\*\* denotes rice importin  $\alpha$ . In all other cases, mammalian importin  $\alpha$  was co-crystallized with NLSs  $\alpha$

Table S3: Plasmids for *S. cerevisiae*

| Plasmid Name (Reporter name)                                             | Encodes <sup>3</sup>                                                                   |
|--------------------------------------------------------------------------|----------------------------------------------------------------------------------------|
| pAK80 (GFP-TM) <sup>1</sup>                                              | GFP-Heh2 <sub>300-379</sub>                                                            |
| pACM023 (GFP-h2NLS-L-TM) <sup>1</sup>                                    | GFP-Heh2 <sub>93-379</sub>                                                             |
| pAK99 ( <i>Sun2</i> NLS-L-TM) <sup>1</sup>                               | GFP- <i>HsSun2</i> <sub>18-106</sub> -Heh2 <sub>138-379</sub>                          |
| pAK100 ( <i>Lem2</i> NLS-L-TM) <sup>1</sup>                              | GFP- <i>MmLem2</i> <sub>128-145</sub> -Heh2 <sub>138-379</sub>                         |
| pAK102 ( <i>LBR</i> NLS-L-TM) <sup>1</sup>                               | GFP- <i>HsLBR</i> <sub>55-113</sub> -Heh2 <sub>138-379</sub>                           |
| pAK103 ( <i>Lap2β</i> NLS-L-TM) <sup>1</sup>                             | GFP- <i>HsLap2β</i> <sub>248-265</sub> -Heh2 <sub>138-379</sub>                        |
| pAK01 (TM-GFP) <sup>2</sup>                                              | TM-GFP (encodes synthetic TM)                                                          |
| pAK54 (TM-L- <i>Pom121</i> NLS <sub>290-484</sub> ) <sup>2</sup>         | TM-Heh2 <sub>145-315</sub> - <i>Pom121</i> <sub>290-484</sub> -GFP                     |
| pAK55 (TM-L- <i>h2</i> NLS) <sup>2</sup>                                 | TM-Heh2 <sub>145-315,93-145</sub> -GFP                                                 |
| pAK95 (TM-L- <i>Pom121</i> NLS <sub>290-326</sub> ) <sup>2</sup>         | TM-Heh2 <sub>145-315</sub> - <i>Pom121</i> <sub>290-326</sub> -GFP                     |
| pAK96 (TM-L- <i>Pom121</i> NLS <sub>290-326</sub> _P2) <sup>2</sup>      | TM-Heh2 <sub>145-345</sub> - <i>Pom121</i> <sub>290-326</sub> (K313→A)<br>-GFP         |
| pAK97 (TM-L- <i>Pom121</i> NLS <sub>290-326</sub> _P2') <sup>2</sup>     | TM-Heh2 <sub>145-345</sub> - <i>Pom121</i> <sub>290-326</sub> (K295→A)<br>-GFP         |
| pAK105 (TM-L- <i>Pom121</i> NLS <sub>290-484</sub> _P2/P2') <sup>2</sup> | TM-Heh2 <sub>145-345</sub> - <i>Pom121</i> <sub>290-484</sub> (K295 and<br>313→A) -GFP |
| pAK107 (TM-L- <i>Pom121</i> NLS <sub>323-484</sub> ) <sup>2</sup>        | TM-Heh2 <sub>145-345</sub> - <i>Pom121</i> <sub>323-484</sub> -GFP                     |
| pAK93 (TM-L44- <i>Pom121</i> NLS <sub>290-484</sub> ) <sup>2</sup>       | TM-Heh2 <sub>145-153,305-315</sub> - <i>Pom121</i> <sub>290-484</sub>                  |
| pAK94 (TM-L53- <i>h2</i> NLS) <sup>2</sup>                               | TM-Heh2 <sub>145-153,305-315,93-145</sub>                                              |
| pAK104 (TM-L44- <i>Pom121</i> NLS <sub>290-326</sub> ) <sup>2</sup>      | TM-Heh2 <sub>145-153,305-315</sub> - <i>Pom121</i> <sub>290-326</sub>                  |

<sup>1</sup>Originates from pUG34, *MET25* promoter is replaced by *GAL1* promoter, N-terminal GFP fusion, HIS3

<sup>2</sup>Originates from pUG23, *MET25* promoter is replaced by *GAL1* promoter, C-terminal GFP-fusion, HIS3

<sup>3</sup>In the Heh2 proteins residues 93-138 are encoding the NLS region and residues 138-379 encode the linker region plus the first TM region. Residues 145-315 encode a major part of the linker region.



Table S4: *S. cerevisiae* strains

| Strains name                 | Genotype                                                                                                  | Sources               |
|------------------------------|-----------------------------------------------------------------------------------------------------------|-----------------------|
| HHY118<br>( <i>Kap95AA</i> ) | MAT $\alpha$ tor1-1 frp1::NAT PMA1-2xFKBP12::TRP1 KAP95-FRB::KAN                                          | (Haruki et al., 2008) |
| <i>heh2</i> $\Delta$         | BY4742 <i>heh2</i> ::KAN                                                                                  | Yeast KO collection   |
| AS1                          | BY4742 <i>heh2</i> ::GFP-HEH2-NAT                                                                         | This study            |
| AS2                          | BY4742 <i>heh2</i> ::GFP-HEH2( $\Delta$ h2NLS)-NAT                                                        | This study            |
| AS5                          | BY4742 <i>heh2</i> ::GFP-HEH2( $\Delta$ h2NLS, <i>Pom121NLS</i> <sub>291-320</sub> )-NAT                  | This study            |
| AS4                          | BY4742 <i>heh2</i> ::GFP-NAT                                                                              | This study            |
| BY4741                       | MAT $\alpha$ <i>his3</i> $\Delta$ 1 <i>leu2</i> $\Delta$ 0 <i>met15</i> $\Delta$ 0 <i>ura3</i> $\Delta$ 0 | Invitrogen            |
| <i>nup84</i> $\Delta$        | BY4741 <i>nup84</i> $\Delta$ ::KAN                                                                        | Yeast KO collection   |

Table S5: Plasmids for HEK293T cells

| Plasmid Name (Reporter name)                                           | Encodes <sup>3</sup>                                    |
|------------------------------------------------------------------------|---------------------------------------------------------|
| pAK111 (2GFP) <sup>1</sup>                                             | 2GFP                                                    |
| pAK112 (2GFP-h2NLS) <sup>1</sup>                                       | 2GFP-Heh2 <sub>93-145</sub>                             |
| pAK113 (2GFP-h2NLS_P2) <sup>1</sup>                                    | 2GFP-Heh2 <sub>93-145</sub> (K126→A)                    |
| pAK114 (2GFP-h2NLS_P2') <sup>1</sup>                                   | 2GFP-Heh2 <sub>93-145</sub> (R103-A)                    |
| pAK115 (2GFP- <i>Pom121NLS</i> <sub>290-484</sub> ) <sup>1</sup>       | 2GFP- <i>Pom121</i> <sub>290-484</sub>                  |
| pAK118 (2GFP- <i>Pom121NLS</i> <sub>290-484</sub> P2/P2') <sup>1</sup> | 2GFP- <i>Pom121</i> <sub>290-484</sub> (K295 and 313→A) |
| pAK119 (2GFP- <i>Pom121NLS</i> <sub>290-326</sub> ) <sup>1</sup>       | 2GFP- <i>Pom121</i> <sub>290-326</sub>                  |
| pAK120 (2GFP- <i>Pom121NLS</i> <sub>290-326</sub> _P2) <sup>1</sup>    | 2GFP- <i>Pom121</i> <sub>290-326</sub> (K313→A)         |
| pAK121 (2GFP- <i>Pom121NLS</i> <sub>290-326</sub> _P2') <sup>1</sup>   | 2GFP- <i>Pom121</i> <sub>290-326</sub> (K295→A)         |
| pAK122 (2GFP- <i>Pom121NLS</i> <sub>290-326</sub> _P2P2') <sup>1</sup> | 2GFP- <i>Pom121</i> <sub>290-326</sub> (K295 and 313→A) |
| pAK123 (2GFP-NPNLS) <sup>1</sup>                                       | 2GFP-X/Nucleoplasmin <sub>153-172</sub>                 |
| pAK37 (GFP-h2NLS-L-TM) <sup>1</sup>                                    | GFP-Heh2 <sub>93-378</sub>                              |
| pAK38 (GFP-L-TM) <sup>1</sup>                                          | GFP-Heh2 <sub>138-378</sub>                             |
| pAK108 (GFP-h2NLS-L37-TM) <sup>1</sup>                                 | GFP-Heh2 <sub>93-145,289-378</sub>                      |
| pAK49 (DAM-h2NLS-L-TM) <sup>2</sup>                                    | DAM-Heh2 <sub>93-378</sub>                              |
| pAK50 (DAM-L-TM) <sup>2</sup>                                          | DAM-Heh2 <sub>138-378</sub>                             |

<sup>1</sup>Originates from peGFP-c1

<sup>2</sup>Originates from pIND/V5-HisA (Invitrogen and (Vogel *et al.*, 2006)

Table S6: Amino acid sequences of reporter proteins in *S. cerevisiae*<sup>1</sup>

|                                                                                                                                            |                                                                                                                                                                                                                                                                                                                                                                                                                                                                                                                                                                                                                                                                            |
|--------------------------------------------------------------------------------------------------------------------------------------------|----------------------------------------------------------------------------------------------------------------------------------------------------------------------------------------------------------------------------------------------------------------------------------------------------------------------------------------------------------------------------------------------------------------------------------------------------------------------------------------------------------------------------------------------------------------------------------------------------------------------------------------------------------------------------|
| GFP-TM (pAK80)<br>(TM: Heh2 <sub>300-379</sub> )                                                                                           | MSKGEELFTGVVPILVELDGDVNGHKFSVSGEGEDATYGKLT <del>LF</del> ICTTGKLPVPWPTLVTTFFGYGVQC<br>FARYPDHMKQHDFFKSAMPEGYVQERTIFFKDDGNYKTRAEVKFEGD <del>TL</del> VNRIELKGI <del>DF</del> KEDGNILGHK<br>LEYNYN <del>SH</del> NVYIMADKQKNGIKVNFKIRHNIEDG <del>SV</del> QLADHYQQNTPIGDGPVLLPDNHYLSTQSALS <del>KD</del><br>PNEKRDH <del>MV</del> LLEFVTAAGITHGMD <del>E</del> LYKSRTSGSRMKANKTKRGIDIMKPFIAHLFIWLNWNGAIFLSIICP<br>ILFGLWYREQRIQVGYCGHEKPLKSLAISAFPQTERVDSVLQAYRP                                                                                                                                                                                                             |
| GFP-NLS-L-TM<br>(L-TM: Heh2 <sub>138-379</sub> )<br><br>(At “_NLS_” the below<br>indicated NLS(-like) sequences<br>are introduced)         | MSKGEELFTGVVPILVELDGDVNGHKFSVSGEGEDATYGKLT <del>LF</del> ICTTGKLPVPWPTLVTTFFGYGVQC<br>FARYPDHMKQHDFFKSAMPEGYVQERTIFFKDDGNYKTRAEVKFEGD <del>TL</del> VNRIELKGI <del>DF</del> KEDGNILGHK<br>LEYNYN <del>SH</del> NVYIMADKQKNGIKVNFKIRHNIEDG <del>SV</del> QLADHYQQNTPIGDGPVLLPDNHYLSTQSALS <del>KD</del><br>PNEKRDH <del>MV</del> LLEFVTAAGITHGMD <del>E</del> LYKSRTS_NLS_PPESPPQSKSDGKATSADLTSELETVEELHKKDS<br>SDDKPRVKELPKPELNLKVSNEFLAQLNKELASAATENYDHSIKSTDLSSIRIETEEVPGPSTGAETRNESE<br>VMENINLEVQPEVKEAKEELTKISETFDNQDEEDTSRLSSKKNIRSPKGRTRHFIANKTKRGIDIMKPFIAHL<br>FIWLNWNGAIFLSIICPILFGLWYREQRIQVGYCGHEKPLKSLAISAFPQTERVDSVLQAYRP                                    |
| <i>h2NLS</i> (pACM023)<br>( <i>Saccharomyces cerevisiae</i> )                                                                              | HGENLLGQGVK <del>D</del> ENVETNKRKREQISTDNEAKMQIQEEKSPKKRKRSSKANK                                                                                                                                                                                                                                                                                                                                                                                                                                                                                                                                                                                                          |
| <i>Sun2NLS</i> (pAK99)<br>( <i>Homo sapiens</i> )                                                                                          | GS <del>G</del> SSSSGGSSVAGSQSTLFDKDSPLR <del>L</del> TKR <del>K</del> SSNMKRLSPAPQLG <del>P</del> SSDAHTSYSESLVHESWFP <del>P</del> RRS <del>L</del> E<br>ELHG <del>D</del> ANWGEDLRVRRRRG                                                                                                                                                                                                                                                                                                                                                                                                                                                                                 |
| <i>Lem2NLS</i> (pAK100)<br>( <i>Mus musculus</i> )                                                                                         | GSGLSYPPHAGPGLRRRAS                                                                                                                                                                                                                                                                                                                                                                                                                                                                                                                                                                                                                                                        |
| <i>LBRNLS</i> (pAK102)<br>( <i>Homo sapiens</i> )                                                                                          | GSKPLTSFRQKGGSTSSPSRRRGSRSRSRSPGRPPKSARRSASASHQADIKEARREV                                                                                                                                                                                                                                                                                                                                                                                                                                                                                                                                                                                                                  |
| <i>Lap2θNLS</i> (pAK103)<br>( <i>Rattus norvegicus</i> )                                                                                   | GSRESTRGSRRTPRKRVETS                                                                                                                                                                                                                                                                                                                                                                                                                                                                                                                                                                                                                                                       |
| TM-GFP (pAK01)<br>(TM: synthetic)                                                                                                          | MPRYAQLVSDVRETQPFASIALSKLPREHGCYGVQIRQERYWLGFLIPCIISLFIAGNWLWIFLHAIFPKMI<br>DIGRKTKNASRTSGSPGLQEFDIKLIDTVLDMSKGEELFTGVVPILVELDGDVNGHKFSVSGEGEDATY<br>GKLT <del>LF</del> ICTTGKLPVPWPTLVTTFFGYGVQCFA <del>R</del> YPDHMKQHDFFKSAMPEGYVQERTIFFKDDGNYKT<br>RAEVKFEGD <del>TL</del> VNRIELKGI <del>DF</del> KEDGNILGHKLEYNYN <del>SH</del> NVYIMADKQKNGIKVNFKIRHNIEDG <del>SV</del> QLA<br>DHYQQNTPIGDGPVLLPDNHYLSTQSALS <del>KD</del> PNKRDH <del>MV</del> LLEFVTAAGITHGMD <del>E</del> LYK                                                                                                                                                                                   |
| TM-L-NLS-GFP<br>(TM: synthetic,<br>L: Heh2 <sub>145-315</sub> )<br><br>(At “_NLS_” the below<br>indicated NLS sequences are<br>introduced) | MPRYAQLVSDVRETQPFASIALSKLPREHGCYGVQIRQERYWLGFLIPCIISLFIAGNWLWIFLHAIFPKMI<br>DIGRKTKNASRTSGSKSDGKATSADLTSELETVEELHKKDSSDDKPRVKELPKPELNLKVSNEFLAQLNKE<br>LASAATENYDHSIKSTDLSSIRIETEEVPGPSTGAETRNESEVMENINLEVQPEVKEAKEELTKISETFDNQD<br>EEDTSRLSSKKNIRSPKGRTRHFIANKTKRGIDIMKPFI_NLS_DIKLIDTVLDMSKGEELFTGVVPILVELD<br>GDVNGHKFSVSGEGEDATYGKLT <del>LF</del> ICTTGKLPVPWPTLVTTFFGYGVQCFA <del>R</del> YPDHMKQHDFFKSA<br>MPEGYVQERTIFFKDDGNYKTRAEVKFEGD <del>TL</del> VNRIELKGI <del>DF</del> KEDGNILGHKLEYNYN <del>SH</del> NVYIMADKQ<br>KNGIKVNFKIRHNIEDG <del>SV</del> QLADHYQQNTPIGDGPVLLPDNHYLSTQSALS <del>KD</del> PNKRDH <del>MV</del> LLEFVTA<br>GITHGMD <del>E</del> LYK |
| <i>Pom121NLS</i> <sub>290-484</sub><br>(pAK54/pAK105)<br>( <i>Rattus norvegicus</i> )                                                      | ALKEK <del>K</del> KRTVAEEDQLHLDGQENKRRRHDSGSGHSAFEPLVANGVPAAFVPKPGLKRLASQSSDDH<br>LNKRSRTSSVSLTSTCTGGIPSSRNAITSSYSSTRGVSQLWKRSGPTSSPFSSPASSRSQTPERPAKKTREE<br>EPCHQSSSAPLVTDKESPGKVTDPATGKQSLWTSPTPGSSGQRKRKIQ                                                                                                                                                                                                                                                                                                                                                                                                                                                            |
| <i>h2NLS</i> (pAK55)<br>( <i>Saccharomyces cerevisiae</i> )                                                                                | AVKDENVETNKRKREQISTDNEAKMQIQEEKSPKKRKRSSKANKPPESPPQS                                                                                                                                                                                                                                                                                                                                                                                                                                                                                                                                                                                                                       |
| <i>Pom121NLS</i> <sub>290-326</sub><br>(pAK95/pAK96/pAK97)<br>( <i>Rattus norvegicus</i> )                                                 | ALKEK <del>K</del> KRTVAEEDQLHLDGQENKRRRHDSGSGHSA                                                                                                                                                                                                                                                                                                                                                                                                                                                                                                                                                                                                                          |
| <i>Pom121NLS</i> <sub>323-484</sub> (pAK107)<br>( <i>Rattus norvegicus</i> )                                                               | AGHSAFEPLVANGVPAAFVPKPGLKRLASQSSDDHLNKRRTSSVSLTSTCTGGIPSSRNAITSSYSST<br>RGVSQLWKRSGPTSSPFSSPASSRSQTPERPAKKTREEEPCHQSSSAPLVTDKESPGKVTDPATGKQSS<br>LWTSPTPGSSGQRKRKIQ                                                                                                                                                                                                                                                                                                                                                                                                                                                                                                        |
| TM-NLS-L44/53-GFP<br><br>(At “_NLS_” the below<br>indicated NLS sequences are<br>introduced)                                               | MPRYAQLVSDVRETQPFASIALSKLPREHGCYGVQIRQERYWLGFLIPCIISLFIAGNWLWIFLHAIFPKMI<br>DIGRKTKNASRTSGSKSDGKATSRGIDIMKPFI_NLS_DIKLIDTVLDMSKGEELFTGVVPILVELDGDVNG<br>GKFSVSGEGEDATYGKLT <del>LF</del> ICTTGKLPVPWPTLVTTFFGYGVQCFA <del>R</del> YPDHMKQHDFFKSAMPEGY<br>VQERTIFFKDDGNYKTRAEVKFEGD <del>TL</del> VNRIELKGI <del>DF</del> KEDGNILGHKLEYNYN <del>SH</del> NVYIMADKQKNGIKV<br>NFKIRHNIEDG <del>SV</del> QLADHYQQNTPIGDGPVLLPDNHYLSTQSALS <del>KD</del> PNKRDH <del>MV</del> LLEFVTAAGITHG<br>MDELYK                                                                                                                                                                           |
| <i>Pom121NLS</i> <sub>290-484</sub> (pAK93)<br>( <i>Rattus norvegicus</i> )                                                                | ALKEK <del>K</del> KRTVAEEDQLHLDGQENKRRRHDSGSGHSAFEPLVANGVPAAFVPKPGLKRLASQSSDDHL<br>NKRRTSSVSLTSTCTGGIPSSRNAITSSYSSTRGVSQLWKRSGPTSSPFSSPASSRSQTPERPAKKTREE<br>PCHQSSSAPLVTDKESPGKVTDPATGKQSLWTSPTPGSSGQRKRKIQ                                                                                                                                                                                                                                                                                                                                                                                                                                                              |
| <i>h2NLS</i> (pAK94)<br>( <i>Saccharomyces cerevisiae</i> )                                                                                | AVKDENVETNKRKREQISTDNEAKMQIQEEKSPKKRKRSSKANKPPESPPQS                                                                                                                                                                                                                                                                                                                                                                                                                                                                                                                                                                                                                       |
| <i>Pom121NLS</i> <sub>290-326</sub> (pAK104)                                                                                               | ALKEK <del>K</del> KRTVAEEDQLHLDGQENKRRRHDSGSGHSA                                                                                                                                                                                                                                                                                                                                                                                                                                                                                                                                                                                                                          |

<sup>1</sup>Green: GFP, italics: transmembrane region, black: ID linker region, red: NLS region with in black and black/underlined the P2 and P2' position respectively

Table S7: Amino acid sequences of reporter proteins in HEK293T cells<sup>1</sup>

|                                                                                                                                                                                                                                                                                                                                                                                                                          |                                                                                                                                                                                                                                                                                                                                                                                                                                                                                                                                                                                                                                                                                                                                                                                                                                                                                                                                              |
|--------------------------------------------------------------------------------------------------------------------------------------------------------------------------------------------------------------------------------------------------------------------------------------------------------------------------------------------------------------------------------------------------------------------------|----------------------------------------------------------------------------------------------------------------------------------------------------------------------------------------------------------------------------------------------------------------------------------------------------------------------------------------------------------------------------------------------------------------------------------------------------------------------------------------------------------------------------------------------------------------------------------------------------------------------------------------------------------------------------------------------------------------------------------------------------------------------------------------------------------------------------------------------------------------------------------------------------------------------------------------------|
| <p>2GFP (pAK111)</p> <p>Between <b>brackets</b> is absent in 2GFP-NLS fusions where the below indicated NLS sequences are introduced</p> <p><i>h2NLS</i> (pAK112)<br/><i>(Saccharomyces cerevisiae)</i></p> <p><i>Pom121NLS</i><sub>290-484</sub><br/>(pAK113/pAK114/ pAK115)<br/><i>(Rattus norvegicus)</i></p> <p><i>Pom121NLS</i><sub>290-326</sub><br/>(pAK119/pAK120/pAK121/<br/>pAK122)</p> <p>NP-NLS (pAK123)</p> | <p>MVSKGEEFTGVVPIVLELDGDVNGHKFVSVEGEGDATYGKLTGKLFICTTGKLPVWPVPTLVTTLTLYGVQC<br/>FSRYPDHMKQHDFFKSAMPEGYVQERTIFFKDDGNYKTRAEVKFEGDTLVNRIELKIDFKEDGNILGHK<br/>LEYNYNSHNVYIMADKQKNGIKVNFKIRHNIEDGVSQVLADHYQQNTPIGDGPVLLPDNHYLSTQSALS<br/>PNEKRDHMLLEFVTAAGITLGMDELKYSGLRSRAMVSKGEEFTGVVPIVLELDGDVNGHKFVSVEGEG<br/>GDATYGKLTGKLFICTTGKLPVWPVPTLVTTLTLYGVQCFSRYPDHMKQHDFFKSAMPEGYVQERTIFFKDDG<br/>NYKTRAEVKFEGDTLVNRIELKIDFKEDGNILGHKLEYNYNSHNVYIMADKQKNGIKVNFKIRHNIEDG<br/>VQLADHYQQNTPIGDGPVLLPDNHYLSTQSALS KDPNEKRDHMLLEFVTAAGITLGMDELKQASNS(<br/>AVDGTAGPGSTGSR)</p> <p>VKDENVETN<u>KR</u>KREQISTDNEAKMQIQEEKSPKKRKRSSKANKPPESPQQS</p> <p>ALKEK<u>K</u>KRTVAEEDQLHLDGQENKRRRHDSGSGHSAFEPLVANGVPAAFVPKPGSLKRSLASQSSDDH<br/>LNKRSRTSSVSLTSTCTGGIPSSRNITSSYSSTRGVSQLWKRSGPTSSPSSPASSRSQTPERPAKKTREE<br/>EPCHQSSSAPLVTDKESPEKGVTDPATGKQQLWTSPTPGSSGQRKRKIQ</p> <p>ALKEK<u>K</u>KRTVAEEDQLHLDGQENKRRRHDSGSGHSA</p> <p>LAAVKRPAATKKAGQAKKKLDGSGSR</p> |
| <p><i>h2NLS-L-TM</i><br/><i>Saccharomyces cerevisiae</i></p> <p>Heh2<sub>93-378</sub> sequence C-terminally fused to GFP or DAM (pAK37/ pAK49)</p> <p>Underlined: absent in L-TM (pA38/ pAK50)</p> <p>Between brackets: absent in <i>h2NLS-L37-TM</i> (pAK108)</p>                                                                                                                                                       | <p>VKDENVETN<u>KR</u>KREQISTDNEAKMQIQEEKSPKKRKRSSKANKPPESPQQS(KSDGKATSADLTSELET<br/>VEELHKDSSDDKPRVKELPKPELNLKVSNEFLAQLNKELASAATENYDHSIKSTDLSIRIETEEVPGPST<br/>GAETRNESEVMENINLEVQPEVKEAKEELTKISETFDNQDEEDTSRLSSKNI)RSPKGRTRHFIANKTKRGI<br/>DIMKPFIAHLFIWLWNGAIFLSIICPIFLGLWYREQRIQVGYCGHEKPLKSLAISAFPQTERVDSVLQAYR</p>                                                                                                                                                                                                                                                                                                                                                                                                                                                                                                                                                                                                                      |

<sup>1</sup>Green: GFP, italics: transmembrane region, black: ID linker region, red: NLS region with in black and black/underlined the P2 and P2' position, respectively
